# Supplementary material for: Effect of a plant extract of fenugreek (Trigonella foenum-graecum) on testosterone in blood plasma and saliva in a double blind randomized controlled intervention study
Source: PubMed Central journal article supplement (PMC11407615; doi:10.1371/journal.pone.0310170), 2024-09-17
Supplement: pone.0310170.s001.pdf [file pone.0310170.s001.pdf]

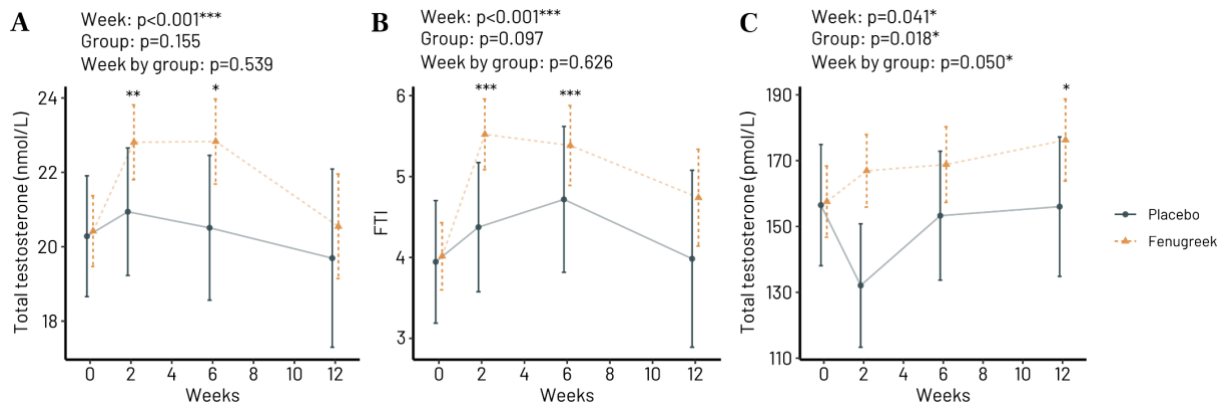

**Sfig. 1. Considering the real intake of TrigozimR supplements for 12 weeks intervention.** The previously presented data (Figures 1-3) are calculated on basis of intention to treat (all participants took all tablets as instructed). If we perform the calculations based on only including participants who took  $\geq 90\%$  tablets we get total plasma testosterone concentration (A), and free testosterone index (FTI; B), and saliva testosterone concentration (C).
